# Supplementary material for: Radiomics predicts the prognosis of patients with locally advanced breast cancer by reflecting the heterogeneity of tumor cells and the tumor microenvironment
Source: PubMed Central journal article supplement (PMC8922933; doi:10.1186/s13058-022-01516-0), 2022-03-15

A

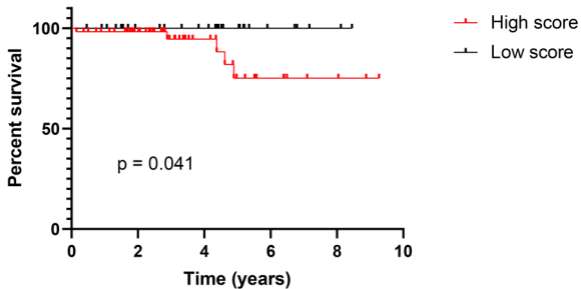

Supplement: 13058_2022_1516_MOESM3_ESM.pdf [file 13058_2022_1516_MOESM3_ESM.pdf]
