# Supplementary material for: Radiomics predicts the prognosis of patients with locally advanced breast cancer by reflecting the heterogeneity of tumor cells and the tumor microenvironment
Source: PubMed Central journal article supplement (PMC8922933; doi:10.1186/s13058-022-01516-0), 2022-03-15
Supplement: 13058_2022_1516_MOESM4_ESM.pdf [file 13058_2022_1516_MOESM4_ESM.pdf]

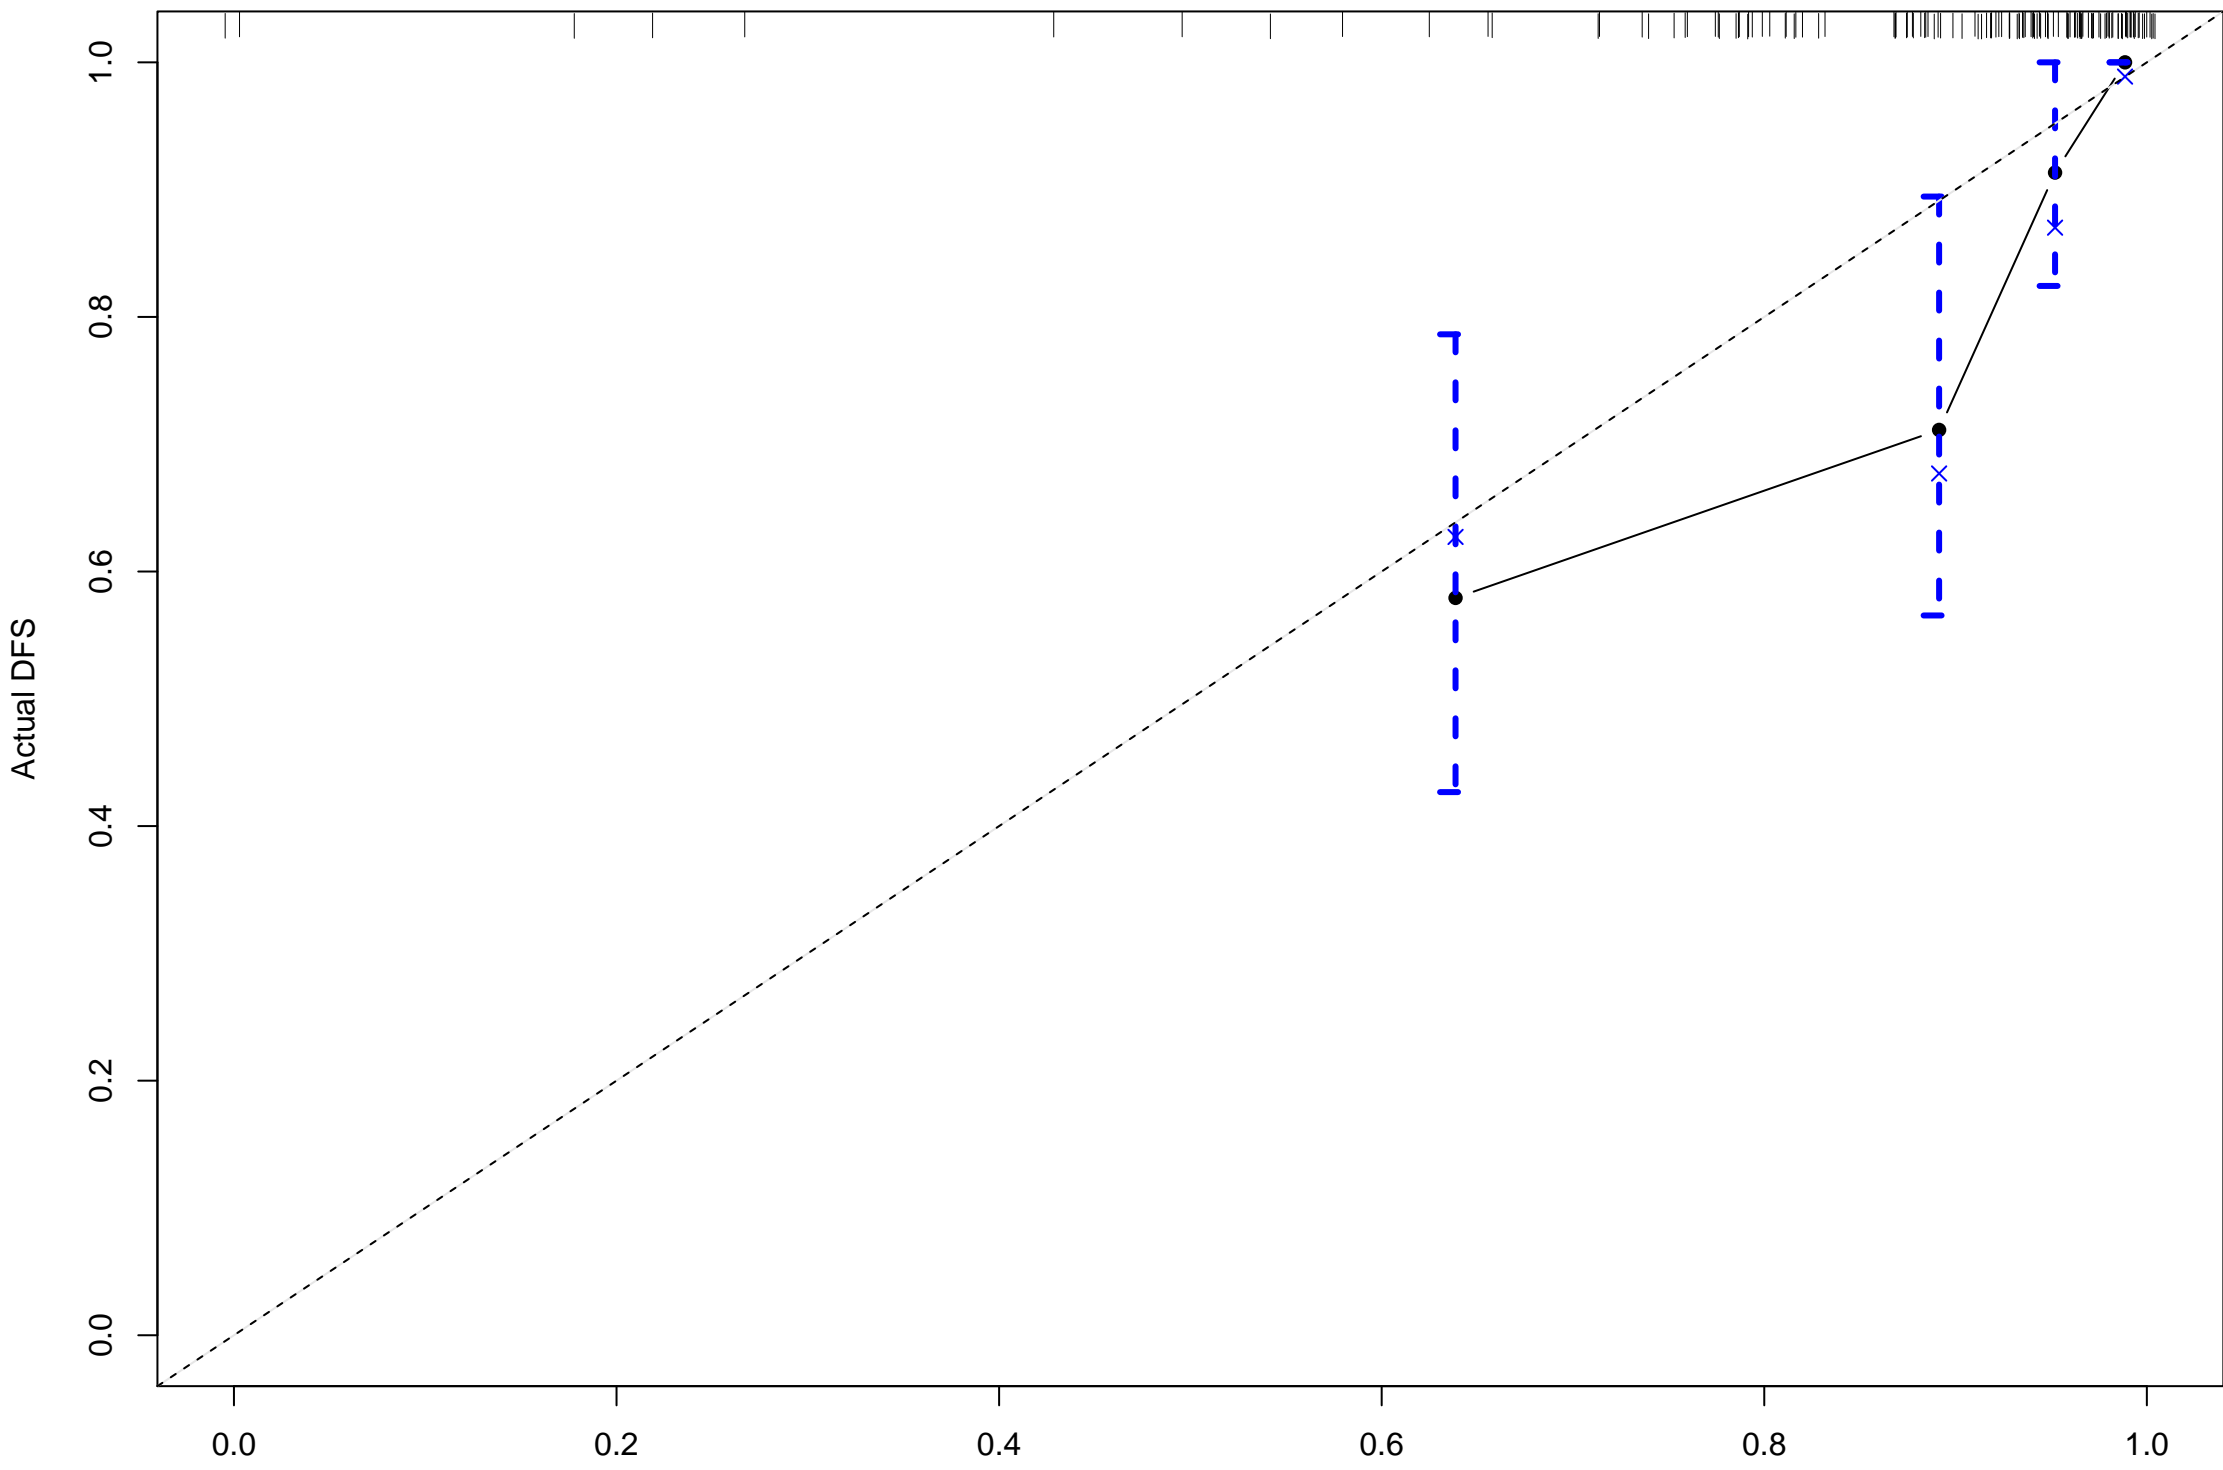

n=139 d=32 p=8, 30 subjects per group  
 Gray: ideal

Nomogram predicted DFS

X - resampling optimism added, B=300  
 Based on observed-predicted
