# Supplementary material for: Radiomics predicts the prognosis of patients with locally advanced breast cancer by reflecting the heterogeneity of tumor cells and the tumor microenvironment
Source: PubMed Central journal article supplement (PMC8922933; doi:10.1186/s13058-022-01516-0), 2022-03-15
Supplement: 13058_2022_1516_MOESM5_ESM.pdf [file 13058_2022_1516_MOESM5_ESM.pdf]

# Workflow

ROI segmentation

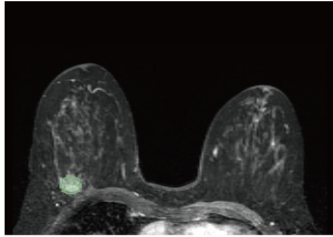

Survival analysis

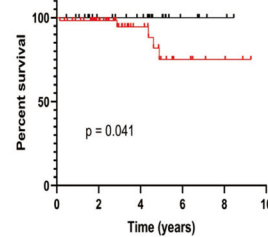

Radiomics score validation

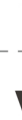

Multi-omics data from TCGA

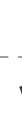

Pathway&GO analysis

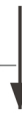

Survival analysis

RNA-Seq

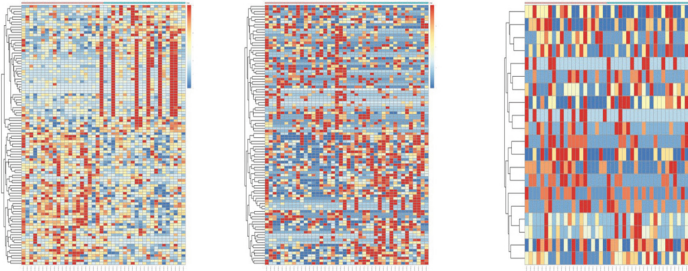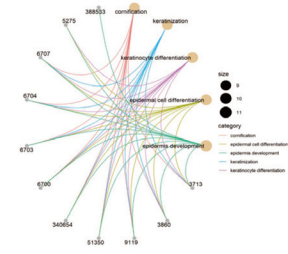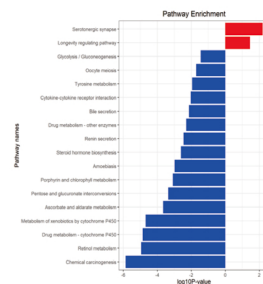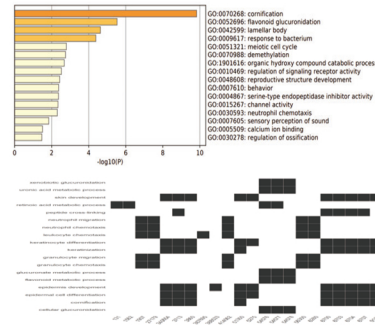

Survival analysis

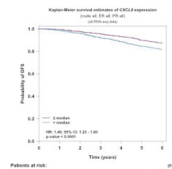

tumor microenvironment

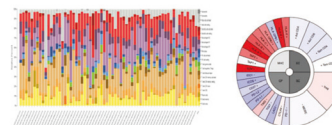

features correlation

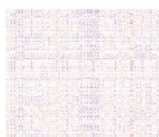

features comparison

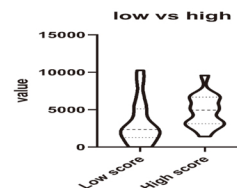

The association with computational histopathology
