# Supplementary material for: Radiomics predicts the prognosis of patients with locally advanced breast cancer by reflecting the heterogeneity of tumor cells and the tumor microenvironment
Source: PubMed Central journal article supplement (PMC8922933; doi:10.1186/s13058-022-01516-0), 2022-03-15
Supplement: 13058_2022_1516_MOESM8_ESM.pdf [file 13058_2022_1516_MOESM8_ESM.pdf]

| Feature class | Feature name                                    |                              |                                   |                               |                         |                                 |                                      |                                     |                               |                                      |
|---------------|-------------------------------------------------|------------------------------|-----------------------------------|-------------------------------|-------------------------|---------------------------------|--------------------------------------|-------------------------------------|-------------------------------|--------------------------------------|
| Shape         | Elongation                                      | Flatness                     | LeastAxisLength                   | MajorAxisLength               | Maximum2DDiameterColumn | Maximum2DDiameterRow            | Maximum2DDiameterSlice               | Maximum3DDiameter                   | MeshVolume                    | MinorAxisLength                      |
|               | Sphericity                                      | SurfaceArea                  | SurfaceVolumeRatio                | VoxelVolume                   |                         |                                 |                                      |                                     |                               |                                      |
| First-order   | 10Percentile                                    | 90Percentile                 | Energy                            | InterquartileRange            | Kurtosis                | Maximum                         | MeanAbsoluteDeviation                | Mean                                | Median                        | Minimum                              |
|               | Range                                           | RobustMeanAbsoluteDeviation  | RootMeanSquared                   | Skewness                      | TotalEnergy             | Variance                        |                                      |                                     |                               |                                      |
| GLDM          | DependenceEntropy                               | DependenceNonUniformity      | DependenceNonUniformityNormalized | DependenceVariance            | GrayLevelNonUniformity  | LargeDependenceEmphasis         | LargeDependenceHighGrayLevelEmphasis | LargeDependenceLowGrayLevelEmphasis | SmallDependenceEmphasis       | SmallDependenceHighGrayLevelEmphasis |
|               | SmallDependenceLowGrayLevelEmphasis             |                              |                                   |                               |                         |                                 |                                      |                                     |                               |                                      |
| GLRLM         | GrayLevelNonUniformity                          | LongRunEmphasis              | LongRunHighGrayLevelEmphasis      | LongRunLowGrayLevelEmphasis   | RunEntropy              | RunLengthNonUniformity          | RunLengthNonUniformityNormalized     | RunPercentage                       | RunVariance                   | ShortRunEmphasis                     |
|               | ShortRunEmphasis                                | ShortRunLowGrayLevelEmphasis |                                   |                               |                         |                                 |                                      |                                     |                               |                                      |
| GLSZM         | GrayLevelNonUniformity                          | LargeAreaEmphasis            | LargeAreaHighGrayLevelEmphasis    | LargeAreaLowGrayLevelEmphasis | SizeZoneNonUniformity   | SizeZoneNonUniformityNormalized | SmallAreaEmphasis                    | SmallAreaHighGrayLevelEmphasis      | SmallAreaLowGrayLevelEmphasis | ZoneEntropy                          |
|               | ZonePercentage                                  | ZoneVariance                 |                                   |                               |                         |                                 |                                      |                                     |                               |                                      |
| Wavelet-based | Wavelet transformation based on above features. |                              |                                   |                               |                         |                                 |                                      |                                     |                               |                                      |
