# Supplementary material for: Radiomics predicts the prognosis of patients with locally advanced breast cancer by reflecting the heterogeneity of tumor cells and the tumor microenvironment
Source: PubMed Central journal article supplement (PMC8922933; doi:10.1186/s13058-022-01516-0), 2022-03-15
Supplement: 13058_2022_1516_MOESM9_ESM.pdf [file 13058_2022_1516_MOESM9_ESM.pdf]

| Feature class | Feature name        |                          |                    |                         |                     |                     |                         |                             |
|---------------|---------------------|--------------------------|--------------------|-------------------------|---------------------|---------------------|-------------------------|-----------------------------|
| Shape         | Area                | Length                   | Circularity        | Solidity                | Maximum diameter    | Minimum diameter    | Nucleus/Cell area ratio |                             |
| Intensity     | Mean                | Min                      | Max                | Standard deviation      | Mean                | Haralick features   |                         |                             |
| Smooth        |                     |                          |                    |                         |                     |                     |                         |                             |
| Tumor cell    | Centroid            | Nucleus Area             | Nucleus Perimeter  | Nucleus Circularity     | Nucleus Max caliper | Nucleus Min caliper | Nucleus Eccentricity    | Nucleus Hematoxylin OD Cell |
|               | Nucleus Eosin OD    | Cell Area                | Cell Perimeter     | Cell Circularity        | Cell Max caliper    | Cell Min caliper    | Cell Eccentricity       | Hematoxylin OD              |
|               | Cell Hematoxylin OD | Cytoplasm Hematoxylin OD | Cytoplasm Eosin OD | Nucleus Cell area ratio |                     |                     |                         |                             |
